1 Genetic variation in parental effects contribute to the evolutionary potential of prey

2 responses to predation risk

3

4 Natasha Tigreros<sup>1\*</sup>

5 Anurag A. Agrawal<sup>1,2</sup>

6 Jennifer S. Thaler<sup>1,2</sup>

7

8 <sup>1</sup>Department of Entomology, Cornell University, Ithaca, New York

9

10 <sup>2</sup>Department of Ecology and Evolutionary Biology, Cornell University, Ithaca, New York

11

12 \*CORRESPONDING AUTHOR: Natasha Tigreros [ntigreros@alumni.tufts.edu](mailto:ntigreros@alumni.tufts.edu)

13

14

15

16

17

18 COMPETING INTERESTS: We have no competing interests.

19

20

21

22

23 **ABSTRACT**

24 Despite the ubiquity of parental effects and their potential impact on evolutionary dynamics,  
25 their contribution to the evolution of ecologically relevant adaptations remains poorly  
26 understood. Using quantitative genetics, here we demonstrate that parental effects contribute  
27 substantially to the evolutionary potential of larval antipredator responses in a leaf beetle  
28 (*Leptinotarsa decemlineata*). Previous research showed that larger *L. decemlineata* larvae elicit  
29 stronger antipredator responses, and mothers perceiving predators improved offspring responses  
30 by increasing intraclutch cannibalism –an extreme form of offspring provisioning. We now  
31 report substantial additive genetic variation underlying maternal ability to induce intraclutch  
32 cannibalism, indicating the potential of this adaptive maternal effect to evolve by natural  
33 selection. We also show that paternal size, a heritable trait, impacted larval responses to  
34 predation risk, but that larval responses themselves had little additive genetic variation. Together,  
35 these results demonstrate how larval responses to predation risk can evolve via two types of  
36 parental effects, both of which provide indirect sources of genetic variation for offspring traits.

37

38

39

40 **KEYWORDS:** transgenerational plasticity, maternal effects, inducible defenses, cannibalism,  
41 predation risk

42

43

44

## 45           1. INTRODUCTION

46    Parental effects, which are widespread in animals and plants, provide an important source of  
47    variation in offspring phenotype and fitness complementing that due to the direct inheritance of  
48    genes (Lande and Kirkpatrick 1990; Mousseau and Fox 1998; Wolf et al. 1998; Räsänen and  
49    Kruuk 2007). From the provisioning of parental care to the transfer of hormones and antibodies  
50    to young, parents alter the phenotype of their offspring, sometimes in an adaptive manner.  
51    Indeed, parental effects have been recognized as an important component of phenotypic variation  
52    that may facilitate rapid evolutionary responses to a number of ecological stressors (Mousseau  
53    and Fox 1998; Räsänen and Kruuk 2007; Donelson et al. 2018). Yet, predictions on the  
54    evolutionary consequences of parental effects are complicated by the fact that parental effects  
55    may be themselves shaped by the environmental conditions that parents experience, by genetic  
56    differences among parents, and by the interaction of these two (McAdam et al. 2014). While  
57    environmental and genetic influences in the parental generation should strongly impact  
58    evolutionary dynamics –increasing vs. decreasing trait response to selection–, little empirical  
59    work to date has partitioned their contribution to variation in offspring traits (reviewed in  
60    Räsänen & Kruuk 2007), especially those involving responses to natural ecological stressors.  
61  
62    Quantitative assessments of parental effects were initially included in quantitative genetic studies  
63    with the sole purpose of controlling for non-genetic sources of variation in offspring (Falconer  
64    and Mackay 1996; Lynch and Walsh 1998; Futuyma 2009). Nonetheless, it is now recognize that  
65    these effects often reflect genetic differences among parents, and therefore can evolve in  
66    response to selective forces occurring in both the parental and the offspring generation (Räsänen  
67    and Kruuk 2007). Importantly, genetic variation in parental effects provides an additional source

68 of genetic variation that would facilitate evolution of offspring traits that hold little additive  
69 genetic variation (Räsänen and Kruuk 2007).

70

71 Parental effects on offspring often reflect environmental hardships that the parents experienced,  
72 including limited food, extreme weather, and a high risk of predation (Mousseau and Dingle  
73 1991; Mousseau and Fox 1998). The triggering of environmental parental effects may reflect a  
74 passive consequence of stress or the resource environment that parents experience, or may  
75 involve adaptive responses counter to those conditions. Research over the last two decades  
76 indicates that parental effects can function as a form of adaptive transgenerational plasticity –  
77 commonly referred as “anticipatory parental effects” (Wade 1998; Agrawal et al. 1999;  
78 Galloway and Etterson 2007; Marshall and Uller 2007; Love and Williams 2008; Sheriff and  
79 Love 2013). Here, parents improve their offspring’s fitness by matching the offspring’s  
80 phenotype to environmental challenges they will likely experience (e.g. Marshall & Uller 2007;  
81 Sheriff & Love 2013). Despite growing evidence on the adaptive nature of parental effects on  
82 offspring (Agrawal et al. 1999; Sheriff et al. 2010; Storm and Lima 2010; Jensen et al. 2014),  
83 evidence of genetic variation in anticipatory parental effects (i.e. maternal genotype by  
84 environment interaction) is scarce in both animals (but see Fox et al. 1999) and plants (Galloway  
85 2005). As a consequence, support for the evolutionary potential of anticipatory parental effects is  
86 to date limited (reviewed in Wade 1998; Räsänen and Kruuk 2007; McAdam et al. 2014).

87

88 Parental effects have been found to be important determinants of traits associated with predator  
89 avoidance in a number of species. For example, in a recent study in a leaf beetle (*Leptinotarsa*  
90 *decemlineata*), we demonstrated that variation in larval responses to predation risk was partially

91 determined by an anticipatory parental effect. When experiencing predation risk, larger  
92 hatchlings were found to elicit stronger antipredator responses –measured as greater feeding  
93 reductions in the presence of predators. Remarkably, mothers increased offspring provisioning  
94 by inducing egg cannibalism within their clutches after detecting a high risk of predation. As a  
95 consequence, cannibalistic offspring –being larger and in better nutritional condition than their  
96 non-cannibal siblings– exhibited stronger responses to predation risk (Tigreros *et al.* 2017).

97

98 Here, we use classic quantitative genetics to examine the relative importance of parental effects  
99 for traits associated to predator avoidance in *L. decemlineata* larvae, including decreased  
100 foraging activity (leaf consumption) and increased assimilation efficiency. Specifically, we first  
101 estimate the contributions of maternal effects ( $V_M$ ), relative to that of additive genetic ( $V_A$ ) and  
102 environmental effects ( $V_E$ ), for larval responses to predation risk. Second, we test if larval  
103 responses to predation risk –which are known to depend on the larva’s initial size–, are  
104 influenced by variation in maternal or paternal body size, a key trait known to impact offspring  
105 phenotype in many systems (Fox 1994; Bernardo 1996a; Fox and Czesak 2000; Bennett and  
106 Murray 2014). Finally, we estimate the relative contribution of additive genetic and  
107 environmental variances ( $V_A$  and  $V_E$ ) of maternal responses to predation risk, including changes  
108 in intraclutch cannibalism –a mechanism linked to an anticipatory maternal effect.

109

## 2. METHODS

### 110 (a) *Breeding design*

111 To estimate the relative contribution of parental effects to larval responses to predation risk we  
112 used a half-sib design (Falconer and Mackay 1996) (see Fig. 1). The experiment was initiated

113 with 25 females collected from a field population in Ithaca, NY, which were allowed to lay eggs  
114 in the laboratory; their offspring, once mature, were considered the “parental generation” (Figure  
115 1) from which sires and dams were selected. All sires, dams, and offspring from the different  
116 sire by dam crosses were reared separately from birth –which minimizes common environmental  
117 effects– and were maintained in standardized conditions, fed with *Solanum tuberosum* L (Yukon  
118 Gold variety) with 18-L : 6-D photoperiod and corresponding temperatures of 23 : 21 °C. The  
119 half-sib families were initially established with 22 males (sires) each randomly mated to three  
120 unrelated females (dams). Sires that failed to inseminate at least two females were excluded and  
121 final analyses included fewer sires and dams, which is specified in each section below.

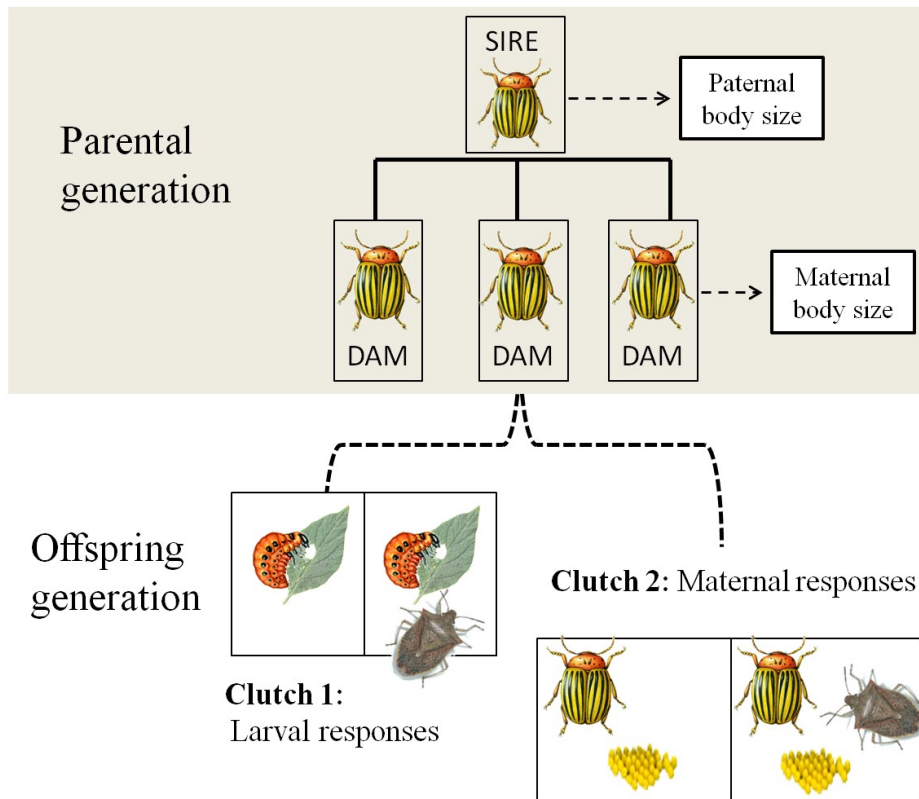

**Fig. 1** Diagram of *L. decemlineata* half-sib split-brood design showing one sire family. Nineteen sires were each mated to three virgin females (dams). The offspring of these three dams were used to investigate parental effects on plastic responses to predation risk: predator-free (P-Free) vs. predation risk (P-Risk). First, we examined the overall contribution of maternal effects ( $V_M$ ), relative to the additive genetic and environmental components ( $V_A$  and  $V_E$ ), to larval anti-predator responses: feeding reductions and increases in assimilation efficiency. Second, we compared how paternal and maternal body size influenced such larval responses to predation risk. Finally, using adult-mated-females, (from Clutch 2), we examined if there was additive genetic variation ( $V_A$ ) underpinning maternal response to predation risk. Maternal responses included changes in clutch size, proportion of viable offspring, and levels of intraclutch cannibalism; the last of these (increases in intraclutch cannibalism), is known to act as an adaptive maternal effect by improving larval anti-predator responses (Tigeros et al. 2017).

123

124 ***(b) Maternal effects on larval responses to predation risk***

125 In a first step, we followed a variance partitioning strategy to quantify the amount of variance in  
126 offspring's traits –larval leaf consumption and assimilation efficiency– that is explained by  
127 maternal identity ( $V_M$ ), while accounting for the contributions of additive genetic inheritance  
128 ( $V_A$ ) and environmental variances ( $V_E$ ) (McAdam et al. 2014). Final analysis included 19 sires  
129 mated to 47 dams (with varying numbers of dams per sire). We estimated larval plastic responses  
130 to predation risk by measuring changes in larval feeding (leaf consumption) and assimilation  
131 efficiency in response to predation risk. To do this, six eggs from each maternal family (within  
132 the same clutch) were separated right before hatching and kept in individual 266 ml cups, which  
133 prevented intraclutch cannibalism and its influences on larval responses (Tigreros et al. 2017).  
134 Additionally, to control for potential effects due to hatching asynchrony within and among  
135 families, we recorded variation in egg pigment levels, Low, Medium, and High, as described in  
136 Tigreros et al. (2017).

137

138 Hatchlings from half of each maternal family were kept with a sham predator (“predation risk”  
139 environment), while the remaining siblings were kept without it, hence experiencing a “predator-  
140 free” environment (Fig. 1). Sham predators consisted of adult male *Podisus maculiventris* –a  
141 generalist stink bug that commonly feeds on *L. decemlineata* larvae– whose stylet's terminal  
142 segment had been removed. While these altered stink bugs are no longer able to kill the beetle  
143 larvae, previous studies have shown that their behaviour and lifespan do not significantly differ  
144 from that of unaltered predators (Griffin and Thaler 2006; Thaler et al. 2012; Kaplan et al. 2014).  
145 Larvae were kept in the predator-free and predation risk environments for a total of three days



146 (4- day old larvae). Then, we measured leaf consumption as consumed leaf area ( $\text{mm}^2$ ) using  
147 ImageJ software (version 1.45), and assimilation efficiency as the ratio of 4-d old larval mass  
148 (measured to the nearest 0.1mg using a Mettler AT261 balance; Mettler Toledo, Columbus, OH,  
149 USA) over amount of leaf consumed.

150

151 Statistical analysis, of maternal effects on larval responses to predation risk, involved the use of  
152 linear mixed models with maximum likelihood estimation. For each trait –leaf consumption and  
153 assimilation efficiency–, we included the treatment effect as a fixed factor (predator-free vs.  
154 predation risk) while the sire, dam, sire-by-treatment interaction and dam-by-treatment  
155 interaction (referred as GxE and MxE) were all included as random factors. Significance of  
156 variance components for larval responses to predation risk were estimated using the REML  
157 method (Proc MIXED) and likelihood ratio tests (Saxton and SAS Institute. 2004). Evidence of a  
158 significant GxE or MxE was investigated in more detail by testing the null hypothesis that  
159 genetic correlations of traits associated with plastic responses to predation risk, measured across  
160 the predator-free and predation risk environment ( $r_A$ ) were = 1 (Lynch and Walsh 1998; Messina  
161 and Fry 2003). Genetic correlations significantly less than 1 suggest the potential for independent  
162 trait evolution in different predation-risk environments and thus would provide additional  
163 support for GxE. Additionally, because expression of maternal and additive genetic effects is  
164 expected to differ within different environments, we estimated the genetic variance components  
165 ( $V_M$ ,  $V_A$ ,  $V_E$ ) and associated genetic parameters (e.g. narrow sense heritabilities and genetic  
166 coefficient of variation) for the larval traits within each environment –predator-free and  
167 predation risk (Table 1S). Variance components were calculated assuming the dominance  
168 variance to be zero:  $V_A = 4\text{sire}$ ,  $V_M = \text{dam} - \text{sire}$ , and  $V_P = \text{total phenotypic variance}$  (Falconer

169 and Mackay 1996). Narrow sense heritabilities ( $h^2$ ) of traits within a predator environment were  
170 then calculated as  $V_A / V_P$ , representing the proportion of the total phenotypic variance  
171 explained by the direct genetic variance (Falconer and Mackay 1996).

172

### 173 **c) Parental size effects on larval responses to predation risk**

174 In a second step, we followed a trait-based approach (McAdam et al. 2014) to investigate the  
175 effects of both maternal and paternal body size on larval plastic responses to predation risk.

176 Here, the effects of specific parental traits, the body size of sires (fathers) and dams (mothers),

177 are modeled. Because our main interest was to investigate effects on larval plastic responses to

178 predation risk (rather than effects on the traits in each environment) we calculated larval plastic

179 responses using Cohen's D effect size =  $\frac{Mean_{Risk-free} - Mean_{Predation\ risk}}{SD_{pooled}}$  and used multiple

180 regression analysis to test for both maternal and paternal size effects (for a similar approach see

181 Bennett and Murray 2014). Given that previous studies have shown that larger hatchlings elicit

182 stronger antipredator responses, we included larval size (averaged for each family) as an

183 additional predictor. Additionally, we analyzed the effects of parental body size on larval

184 responses using a "hybrid approach" (McAdam et al. 2014), which included sire and dam

185 identities (as described in "maternal effects on larval responses to predation risk") plus maternal

186 (or paternal) body size and its interaction with predation risk treatment as fixed effects ( $Size_{sire} \times$

187  $E$  and  $Size_{dam} \times E$ ). This approach allow us to model the effects of specific parental traits (here

188 body size) while accounting for the remaining variation in maternal and sire effects ( $V_M$  and  $V_A$ ).

189 However, these more complex models, especially when unbalanced, may bias estimates of

190 genetic parameters as well as inference for fixed effects (e.g. Kenward and Roger 1997; Stroup

191 and Littell 2002).

192

193 ***(d) Maternal plastic responses to predation risk***

194 In a last experiment, we measured the amount of genetic variance (and associate genetic  
195 parameters) underlying maternal responses to predation risk including clutch size, levels of  
196 intraclutch cannibalism, and proportion of viable offspring within a clutch (Fig. 1). Note that  
197 although intraclutch cannibalism and clutch size may influence progeny phenotype (e.g. progeny  
198 size), these are here considered a maternal rather than an offspring trait (see Mousseau & Fox  
199 1998). To measure maternal responses to predation risk, two females from each maternal family  
200 (and the same clutch) were individually reared to adults and mated with a full sibling. Because  
201 males in a number of insects can influence female reproduction (e.g. fecundity), mating full sibs  
202 may reduce chances to introduce an additional source of variation to the estimates of additive  
203 genetic variance in maternal traits. Importantly, mating full-sibs did not cause any apparent  
204 inbreeding effects in female reproduction: clutch size and offspring produced by full-sib pairs  
205 were comparable to those observed in females that had mated with unrelated males (see  
206 Inbreeding analysis in Supplemental information). After mating, half of the females were each  
207 kept with two sham predators (predation risk environment) in a 0.5 L cup, with abundant plant  
208 foliage for feeding and oviposition. The rest of females were kept in similar conditions but  
209 without the sham predators (predator-free environment). We collected the first two clutches that  
210 females laid and stored them individually with a fresh leaflet (in 30 ml cups). Clutch size  
211 (number of eggs) and offspring produced were measured in the same clutch while intraclutch  
212 cannibalism, the proportion of eggs that were fully consumed by the new hatchlings, were  
213 measured on a second clutch (Collie et al. 2013; Tigreros et al. 2017).

214

215 The statistical approach to examine maternal responses to predation risk was similar to that used  
216 for larval responses to predation risk but, because each dam included only one daughter per  
217 treatment, maternal effects on maternal responses to predation risk ( $V_M \times E$ ) cannot be estimated.  
218 Final analysis of maternal responses to predation risk included 15 sires mated to 32.  
219 Additionally, to estimate variance components for levels of intraclutch cannibalism we used a  
220 generalized linear model using LAPLACE method (Proc GLIMMIX), which captured the  
221 binomial distribution of intraclutch cannibalism using a logit link function (Saxton and SAS  
222 Institute. 2004). Because the residual variance estimates of this type of model is correlated with  
223 the mean of the population, we estimated heritability as “latent-scale heritability”, by adding the  
224 variance component related to the link function (Nakagawa and Schielzeth 2010; Calsbeek et al.  
225 2015), which for binomial models is  $= \frac{V_A}{V_P + \pi^2/3}$ . All analyses were conducted using SAS 9.4  
226 (SAS Institute Inc., Cary, NC, USA).

227

### 228 **3. RESULTS**

#### 229 ***(a) Maternal effects on larval responses to predation risk***

230 Larval plastic responses to predation risk were substantial, involving a 22% reduction in leaf  
231 consumption ( $F_{1,18}=7.53$ ,  $P = 0.01$ ; Fig. 2A, Table 1A) and a 17% increase in assimilation  
232 efficiency ( $F_{1,18}=5.43$ ,  $P = 0.03$ ; Fig. 2B, Table 1 A). Yet, we did not detect a significant  
233 interaction between predation risk and sire or dam families influencing the larval traits (Table  
234 1A: Sire x Risk and Dam x Risk), which indicates that there was substantial plasticity in larval  
235 responses to predation risk, but there was not a detectable genetic or maternal variance  
236 underpinning larval responses.

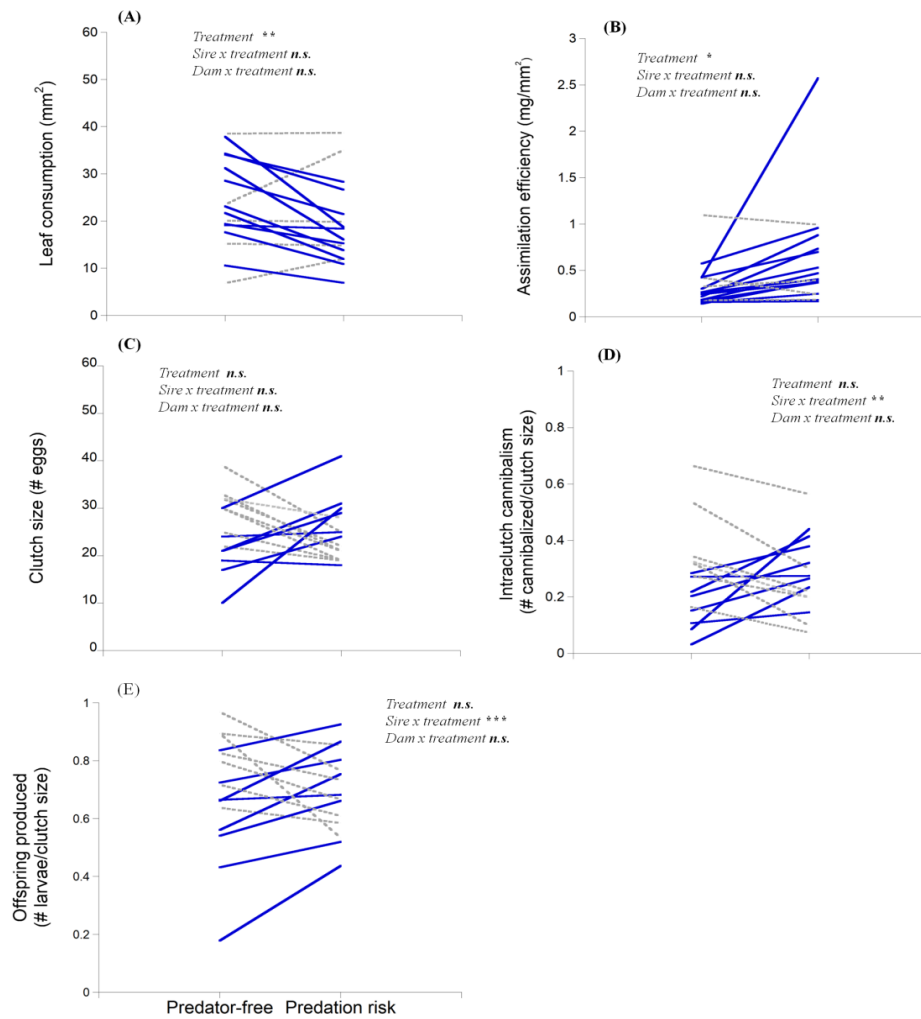

237 -

238 **Figure 2.** Reaction norms for *L. decemlineata* describing plastic responses to predation risk in terms  
239 of (A) Larval leaf consumption, (B) Larval assimilation efficiency, (C) Adult clutch size, (D)  
240 Intraclutch cannibalism and (E) Offspring number per clutch. Each line represents the mean score for  
241 each sire family. The slope of the line is a graphical representation of the strength and direction of  
242 plastic responses to predation risk shown by that family. Highlighted with solid blue lines (vs. dotted  
243 grey lines) are the families that responded to predation risk in a direction that would typically  
244 improve offspring fitness (see Table 1 for further statistical elaboration).

**(A) Larval responses**

| Leaf consumption |          | <i>Fit statistic (-2 ResLogLikelihood): 2768.3</i> |                 |  |
|------------------|----------|----------------------------------------------------|-----------------|--|
| Fix effects      | F        | df                                                 | P               |  |
| Risk             | 7.53     | 1,18                                               | 0.013           |  |
| Egg-age          | 2.88     | 2, 229                                             | 0.058           |  |
| Random Effects   | Estimate | SE                                                 | P               |  |
| Sire             | 16.44    | 51.2                                               | —               |  |
| Dam(sire)        | 228.82   | 73.48                                              | —               |  |
| Sire x Risk      | 17.46    | 17.6                                               | > 0.05 (2768.2) |  |
| Dam x Risk       | 2.366    | 21.08                                              | > 0.05 (2769.6) |  |
| Error            | 269.02   | 25.1                                               |                 |  |

  

| Assimilation efficiency |          | <i>Fit statistic (-2 ResLogLikelihood): 337.7</i> |                |  |
|-------------------------|----------|---------------------------------------------------|----------------|--|
| Fix effects             | F        | df                                                | P              |  |
| Risk                    | 5.43     | 1,18                                              | 0.03           |  |
| Egg-age                 | 1.63     | 1,231                                             | 0.19           |  |
| Random Effects          | Estimate | SE                                                | P              |  |
| Sire                    | 0.0055   | 0.014                                             | —              |  |
| Dam(sire)               | 0.0356   | 0.017                                             | —              |  |
| Sire x Risk             | 0        |                                                   | > 0.05 (337.7) |  |
| Dam x Risk              | 0        |                                                   | > 0.05 (337.7) |  |
| Error                   | 0.138    | 0.0117                                            |                |  |

**(B) Maternal responses**

| Clutch Size    |          | <i>Fit statistic (-2 ResLogLikelihood): 892.64</i> |                 |  |
|----------------|----------|----------------------------------------------------|-----------------|--|
| Fix effects    | F        | df                                                 | P               |  |
| Risk           | 0.52     | 1,14                                               | 0.48            |  |
| Random Effects | Estimate | SE                                                 | P               |  |
| Sire           | 0        |                                                    | —               |  |
| Dam(sire)      | 40.5     | 17.35                                              | —               |  |
| Sire x Risk    | 6.25     | 11.3                                               | > 0.05 (893.01) |  |
| Error          | 88.19    | 15.59                                              |                 |  |

  

| Intraclutch cannibalism |          | <i>Fit statistic (-2 ResLogLikelihood): 244.26</i> |                  |  |
|-------------------------|----------|----------------------------------------------------|------------------|--|
| Fix effects             | F        | df                                                 | P                |  |
| Risk                    | 0.37     | 1,13                                               | 0.5              |  |
| Random Effects          | Estimate | SE                                                 | P                |  |
| Sire                    | 0.0066   | 0.209                                              | —                |  |
| Dam(sire)               | 0.296    | 0.16                                               | —                |  |
| Sire x Risk             | 0.389    | 0.205                                              | <0.0001 (335.27) |  |
| Error                   | 1.99     | 0.347                                              |                  |  |

  

| Proportion of offspring |          | <i>Fit statistic (-2 ResLogLikelihood): -48.08</i> |               |  |
|-------------------------|----------|----------------------------------------------------|---------------|--|
| Fix effects             | F        | df                                                 | P             |  |
| Risk                    | 0.06     | 1,13                                               | 0.81          |  |
| Random Effects          | Estimate | SE                                                 | P             |  |
| Sire                    | 0.0089   | 0.0093                                             | —             |  |
| Dam(sire)               | 0.012    | 0.0064                                             | —             |  |
| Sire x Risk             | 0.0074   | 0.0053                                             | 0.023(-44.06) |  |
| Error                   | 0.0215   | 0.0037                                             |               |  |

**Table 1.** Tests on the statistical

significance of the predation risk treatment (Risk) and its interaction with the dam (MxE) and sire (GxE) components. Interaction terms were tested using likelihood ratio test that compare the fit statistic, *-2 ResLog likelihood fit*, of the full model (showed on top row) with that of the model without the term of interest (showed in parenthesis after the P value).

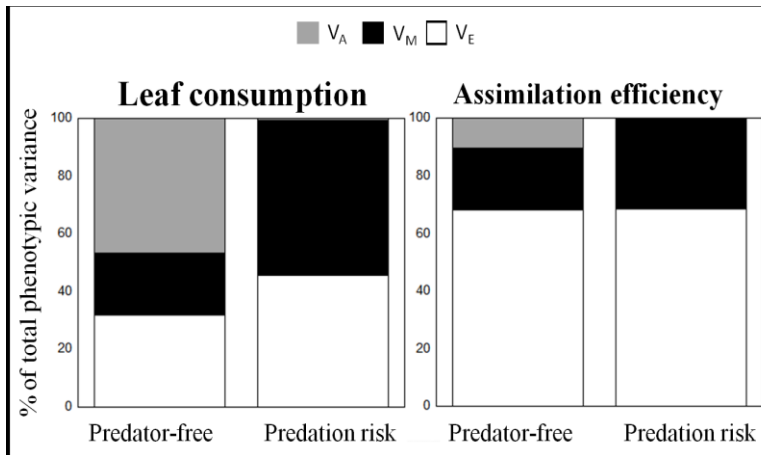

**Fig. 3** Percent of phenotypic variation (for leaf consumption and assimilation efficiency) explained by the different genetic components of variation within each predator. Genetic components of variation include: additive genetic ( $V_A$ ), maternal ( $M_A$ ), and environmental ( $V_E$ ) effects.

246 Partitioning of variance components of larval traits within each predator environment (predator-  
247 free and predation risk environment) showed, as expected, differences in the relative importance  
248 of maternal ( $V_M$ ) and additive genetic effects ( $V_A$ ) (Fig. 3; Table 1S). While maternal effects  
249 ( $V_M$ ) explained a large proportion of the phenotypic variance in both environments, this was  
250 even stronger when in the predation risk environment, explaining over 50% of the variation in  
251 leaf consumption and about 30% in assimilation efficiency ( Fig. 3; Table S1 in Supplemental  
252 information). In contrast, levels of additive genetic variation ( $V_A$ ) were not statistically  
253 significant in either environment (Table S1). Note, however, that the number of sire families in  
254 our study was close to the minimum recommended to detect  $V_A$  (Conner and Hartl 2004) and  
255 therefore, finding no additive genetic variance in larval traits could be due to a low statistical  
256 power rather than an absolute lack of genetic variance.

257

### 258 ***(b) Parental size effects on larval responses to predation risk***

259 To test parental size effects on larval responses, we first partitioned variation of adult body size  
260 into additive genetic and environmental components. These results revealed a significant additive

261 genetic component ( $V_A = 0.078 \pm 0.056$ ,  $p=0.025$ ), with moderate heritability levels ( $h^2 = 0.2$ ),  
262 underlying body size in adults.  
263  
264 Evaluation of parental size effects on larval responses provided similar results using both the  
265 trait-based approach of regressing parents' body size on larval responses– and the hybrid  
266 approach of including parent's body size as covariate plus Sire and Dam identities (McAdam et  
267 al. 2014). Regression analyses (controlling offspring size), revealed that paternal body size, but  
268 not maternal body size, influenced both the magnitude and direction of larval responses to  
269 predation risk including leaf consumption ( $R^2 = 0.26$ :  $\beta_{\text{sire}} = -0.51$ ,  $p = 0.001$ ;  $\beta_{\text{dam}} = 0.04$ ,  $p =$   
270  $0.25$ ;  $\beta_{\text{larvae}} = 0.06$ ,  $p = 0.4$ ; Fig. 4A), and assimilation efficiency ( $R^2 = 0.23$ :  $\beta_{\text{sire}} = 0.48$ ,  $p =$   
271  $0.003$ ;  $\beta_{\text{dam}} = -0.05$ ;  $p = 0.73$ ;  $\beta_{\text{larvae}} = 0.04$ ,  $p = 0.77$ ; Fig. 4B). Smaller sires producing larvae  
272 with the strongest responses (reduced feeding and increased assimilation efficiency). Results  
273 from models that included sire and dam identity corroborated the effect of sire size on larval  
274 responses (Table S2 in Supplemental information).



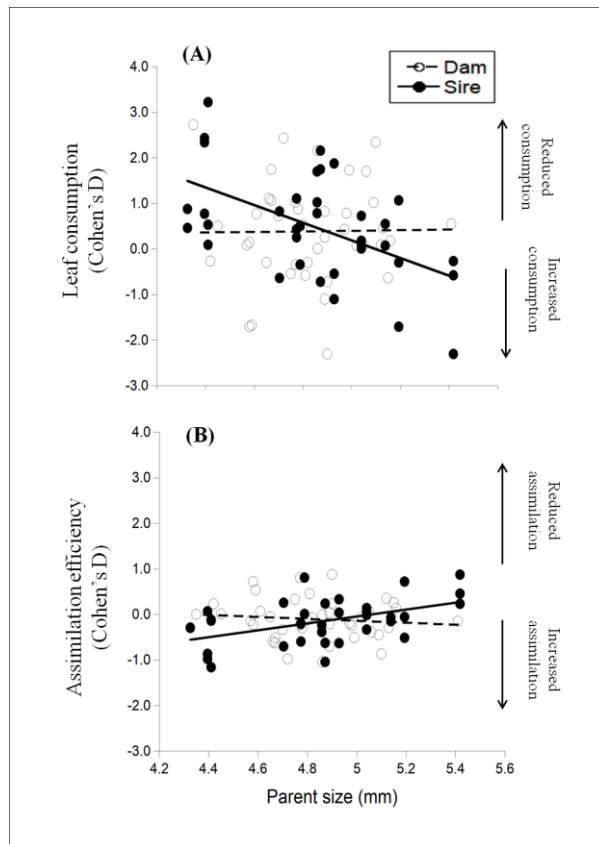

**Fig. 4.** Parental body size effects on larval responses to predation risk for (A) leaf consumption and (B) assimilation efficiency in *L. decemlineata* larvae. The magnitude and direction of larval plastic responses were calculated using Cohen's D effect size ( $\frac{Mean_{Risk-free} - Mean_{Predation\ risk}}{SD_{pooled}}$ ). Each observation represents the effect size and mean body size for each maternal family (full siblings).

**(b) Maternal response to predation risk**

Analyses of maternal responses to predation risk indicated that there was not a main effect of predation risk treatment on clutch size, intraclutch cannibalism, or number of viable offspring produced per clutch (Table 1B; Fig. 2C-E). However, there was a significant sire by predation treatment interaction for proportion of intraclutch cannibalism and number of viable larvae produced, indicating that there is substantial genetic variation for these maternal traits, involving differences in the magnitude as well the direction of the response (Fig. 2 D, E). Further investigation of this GxE, by testing significance of genetic correlations across the predator-free and predation risk environments, indicated that these were significantly less than 1 (intraclutch cannibalism  $r_A = -0.01$ ,  $se = 0.7$ ,  $p = 0.03$ ; proportion of offspring  $r_A = 0.74$ ,  $se = 0.5$ ,  $p < 0.0001$ ). These results suggest the

298 potential for independent trait evolution in the different predation environments, providing  
299 additional support for GxE in maternal responses to predation risk (Lynch and Walsh 1998).

300

## 301 DISCUSSION

302 Parental effects are important determinants of traits associated with predator avoidance in a  
303 number of species. As for all phenotypes, parental effects are shaped by the environment, the  
304 genotype, and their interaction. Only by disentangling the relative contribution of such different  
305 sources of parental effects –e.g., those owed to the environment vs. the parent’s genes– we can  
306 understand their role in organisms’ evolution.

307

308 As observed in previous studies of *L. decemlineata* (Hermann and Thaler 2014; Kaplan et al.  
309 2014; Tigreros et al. 2017, 2018), we found strong plastic responses to predation risk, involving  
310 28% reductions in leaf consumption and 15% increases in assimilation efficiency. Coupling of  
311 feeding reductions with increased assimilation efficiency is critical to prey fitness, as this allows  
312 prey to lower chances of predation while minimizing costs associated with reduced-food intake  
313 (Thaler et al. 2012; Kaplan et al. 2014). Based on 19 sires, we found little support of an additive  
314 genetic or a maternal component underpinning larval responses to predation risk. However,  
315 analyses that included size of the parents as covariates revealed that variation in responses –for  
316 both leaf consumption and assimilation efficiency– were at least partially explained by paternal  
317 size. Specifically, smaller fathers produced larvae with the greatest plasticity in response to  
318 predation risk –strong feeding reductions and increases in assimilation efficiency. Given that  
319 females often provide more reproductive investment than males, studies on parental effects often  
320 rely on the notion that the maternal phenotype is the main influence on the offspring. However,

321 as we found in this study, male body size can be linked to parental performance (Eilertsen et al.  
322 2009), perhaps through changes in the quality of their ejaculates (Gillott 2003), which is known  
323 to include accessory glands compounds in *L. decemlineata* beetles (Loof and Lagasse 1972).  
324 Independent of the exact mechanism, because adult body size had a significant additive genetic  
325 component, size related paternal effects represented an indirect source of genetic variation  
326 shaping larval plastic responses to predation risk.

327  
328 Estimates of maternal variance ( $V_M$ ) explained about half of the phenotypic variance in leaf  
329 consumption when expressed under high risk of predation. These results are concordant with the  
330 notion that the contribution of parental effects, relative to the environmental and additive genetic  
331 variance components, is high for traits that are expressed early in life (Bernardo 1996b;  
332 Lindholm et al. 2006; Wilson and Reale 2006; White and Wilson 2019) and under environmental  
333 stress (e.g. Rudin-Bitterli, Mitchell & Evans 2018).

334  
335 In a previous study we demonstrated that larval responses to predation risk (including decreases  
336 in leaf consumption) was improved through an anticipatory parental effect: mothers experiencing  
337 the risk of predation increased offspring provisioning by inducing intraclutch cannibalism  
338 (Tigreros et al. 2017); cannibals, in better nutritional condition than non-cannibal siblings,  
339 exhibited stronger antipredator behaviors. Here, we found that mothers indeed responded to  
340 predation risk by altering levels of egg cannibalism within their clutches. However, such  
341 responses varied in magnitude and direction, with some families increasing and others  
342 decreasing cannibalism. In *L. decemlineata*, intraclutch cannibalism results in a classic life  
343 history tradeoff between investment in offspring quality (cannibalistic offspring) and quantity

344 (cannibalized offspring). While fitness of the individual offspring may always improve with  
345 cannibalism, optimal levels of cannibalism within a clutch should reflect the number of  
346 cannibalistic offspring that would maximize female reproductive success in a given environment  
347 (e.g. under predation risk). Finding that families with the highest and lowest levels of intraclutch  
348 cannibalism –in the predator-free environment– responded to predation risk by decreasing and  
349 increasing cannibalism respectively, suggests that intermediate levels of intraclutch cannibalism  
350 may be optimal under environments with high predation risk. Importantly, such variation in  
351 maternal responses to predation risk (changes in intraclutch cannibalism and offspring produced)  
352 reflected genetic differences among the mothers (significant GxE) indicating the potential for  
353 evolutionary change of a maternal effect, in response to predator.

354

355 The conditions under which organisms rely on parental effects vs. within-generation phenotypic  
356 plasticity remains an open question in evolutionary ecology. Using plasticity alone, *L.*  
357 *decemlineata* larvae can achieve substantial feeding reductions (e.g. ~28% in this study) when  
358 facing predation risk. However, our previous work indicates that these responses are constrained  
359 by the larvae's nutritional state (Tigreros et al. 2017), and larvae feeding on lower quality host  
360 plants have shown weaker feeding reductions in response to predation risk (Kaplan et al. 2014;  
361 Tigreros et al. 2017). Through cannibalism, *L. decemlineata* appears to overcome such  
362 nutritional constraints, and cannibals that experience predation risk are capable of reducing leaf  
363 consumption, even on low quality host plants. Thus, this extreme type of maternal investment  
364 should improve offspring fitness when facing highly stressful environments (Marshall et al.  
365 2008; Olofsson et al. 2009).

366

367 Recent theoretical evidence suggests that evolution of parental effects is promoted when there is  
368 strong selection on the phenotype and when within-generation plasticity is constrained (Auld et  
369 al. 2010; Kuijper and Hoyle 2015). Predation is unquestionably one of the strongest selective  
370 forces in nature, and is therefore thus likely to deplete genetic variation in traits associated with  
371 predator avoidance. In contrast, genetic variation underlying paternal and maternal effects is  
372 expected to remain “protected” from the eroding effects of selection when carried by the other  
373 sex (Wade 1998). Accordingly, results from this study indicate that even if larval responses to  
374 predation risk were holding little or no genetic variation, parental effects –via induced intraclutch  
375 cannibalism and paternal body size– should provide the necessary genetic variation for future  
376 natural selection to act upon (Räsänen and Kruuk 2007). Additionally, because *L. decemlineata*  
377 larval nutritional condition is a function of host plant quality as well as the degree of maternal  
378 provisioning, evolution of paternal effects may be favored in environments where larval  
379 plasticity is constrained by poor host plant quality. Together, our results show that the  
380 evolutionary potential of predator avoidance in *L. decemlineata*, relies on at least two different  
381 genetic parental effects, one linked to paternal body size and the other to maternal induction of  
382 intraclutch cannibalism.

383

384

#### 385 ACKNOWLEDGEMENTS

386 We thank Rachel H. Norris for help with collection of data. We also thank Kyle Benowitz and  
387 Nicholas Aflitto, and two anonymous reviewers for their valuable comments on the manuscript.  
388 This work was supported by USDA grants to JST: NIFA 2013-02649, Federal Capacity Funds  
389 1397484; and AFRI 2018-67013-28068.

390

391 REFERENCES

392 Agrawal, A. A., C. Laforsch, and R. Tollrian. 1999. Transgenerational induction of defences in  
393 animals and plants. *Nature* 401:60–63.

394 Auld, J. R., A. A. Agrawal, and R. A. Relyea. 2010. Re-evaluating the costs and limits of  
395 adaptive phenotypic plasticity. *Proceedings. Biological sciences* 277:503–11.

396 Bennett, A. M., and D. L. Murray. 2014. Maternal body condition influences magnitude of anti-  
397 predator response in offspring. *Proceedings of the Royal Society B: Biological Sciences*  
398 281:20141806–20141806.

399 Bernardo, J. 1996*a*. The particular maternal effect of propagule size, especially egg size:  
400 patterns, models, quality of evidence and interpretations. *American Zoologist* 36:216–236.

401 Bernardo, J. 1996*b*. Maternal effects in animal ecology. *American Zoologist* 36:83–105.

402 Calsbeek, R., M. C. Duryea, D. Goedert, P. Bergeron, and R. M. Cox. 2015. Intralocus sexual  
403 conflict, adaptive sex allocation, and the heritability of fitness. *Journal of Evolutionary Biology*  
404 28:1975–1985.

405 Collie, K., S. J. Kim, and M. B. Baker. 2013. Fitness consequences of sibling egg cannibalism by  
406 neonates of the Colorado potato beetle, *Leptinotarsa decemlineata*. *Animal Behaviour* 85:329–  
407 338.

408 Conner, J. K., and D. L. Hartl. 2004. *A Primer of Ecological Genetics*. BioScience.

409 Donelson, J. M., S. Salinas, P. L. Munday, and L. N. S. Shama. 2018. Transgenerational

- 410 plasticity and climate change experiments: Where do we go from here? *Global Change Biology*.
- 411 Eilertsen, E. M. K., B. J. Bårdsen, S. Liljedal, G. Rudolfson, and I. Folstad. 2009. Experimental  
412 evidence for paternal effects on offspring growth rate in Arctic charr (*Salvelinus alpinus*).  
413 *Proceedings of the Royal Society B: Biological Sciences*.
- 414 Falconer, D. S., and T. F. C. Mackay. 1996. *Introduction to Quantitative Genetics* (4th Edition).  
415 *Trends in Genetics* (Vol. 12).
- 416 Fox, C. W. 1994. Maternal and genetic influences on egg size and larval performance in a seed  
417 beetle (*Callosobruchus maculatus*): multigenerational transmission of a maternal effect? *Heredity*  
418 73:509–517.
- 419 Fox, C. W., and M. E. Czesak. 2000. Evolutionary ecology of progeny size in arthropods.  
420 *Annual Review of Entomology* 45:341–369.
- 421 Fox, C. W., M. E. Czesak, T. A. Mousseau, and D. A. Roff. 1999. The Evolutionary Genetics of  
422 an Adaptive Maternal Effect: Egg Size Plasticity in a Seed Beetle. *Evolution* 53:552.
- 423 Futuyma, D. J. 2009. *Evolution*. *Evolution*.
- 424 Galloway, L. F. 2005. Maternal effects provide phenotypic adaptation to local environmental  
425 conditions. *New Phytologist*.
- 426 Galloway, L. F., and J. R. Etterson. 2007. Transgenerational Plasticity Is Adaptive in the Wild.  
427 *Science* 318:1134–1136.
- 428 Gillott, C. 2003. Male accessory gland secretions: modulators of female reproductive physiology  
429 and behavior. *Annu Rev Entomol*.

- 430 Griffin, C. A. M., and J. S. Thaler. 2006. Insect predators affect plant resistance via density- and  
431 trait-mediated indirect interactions. *Ecology Letters* 9:338–346.
- 432 Hermann, S. L., and J. S. Thaler. 2014. Prey perception of predation risk: volatile chemical cues  
433 mediate non-consumptive effects of a predator on a herbivorous insect. *Oecologia* 176:669–676.
- 434 Jensen, N., R. M. Allen, and D. J. Marshall. 2014. Adaptive maternal and paternal effects:  
435 Gamete plasticity in response to parental stress. *Functional Ecology*.
- 436 Kaplan, I., S. H. McArt, and J. S. Thaler. 2014. Plant defenses and predation risk differentially  
437 shape patterns of consumption, growth, and digestive efficiency in a guild of leaf-chewing  
438 insects. *PloS one* 9:e93714.
- 439 Kenward, M. G., and J. H. Roger. 1997. Small Sample Inference for Fixed Effects from  
440 Restricted Maximum Likelihood. *Biometrics* 53:983.
- 441 Kuijper, B., and R. B. Hoyle. 2015. When to rely on maternal effects and when on phenotypic  
442 plasticity? *Evolution; international journal of organic evolution* 69:950–68.
- 443 Lande, R., and M. Kirkpatrick. 1990. Selection response in traits with maternal inheritance.  
444 *Genetical Research* 55:189–197.
- 445 Lindholm, A. K., J. Hunt, and R. Brooks. 2006. Where do all the maternal effects go? Variation  
446 in offspring body size through ontogeny in the live-bearing fish *Poecilia parae*. *Biology Letters*.
- 447 Loof, A., and A. Lagasse. 1972. The ultrastructure of the male accessory reproductive glands of  
448 the colorado beetle. *Zeitschrift für Zellforschung und Mikroskopische Anatomie* 130:545–552.
- 449 Love, O. P., and T. D. Williams. 2008. The adaptive value of stress-induced phenotypes: Effects



- 450 of maternally derived corticosterone on sex-biased investment, cost of reproduction, and  
451 maternal fitness. *American Naturalist* 172:E135–E149.
- 452 Lynch, M., and B. Walsh. 1998. *Genetics and analysis of quantitative traits*. Sinauer Associates;  
453 1 edition. 980p.
- 454 Marshall, D. J., R. Bonduriansky, and L. F. Bussière. 2008. Offspring size variation within  
455 broods as a bet-hedging strategy in unpredictable environments. *Ecology* 89:2506–2517.
- 456 Marshall, D. J., and T. Uller. 2007. When is a maternal effect adaptive? *Oikos*.
- 457 McAdam, A. G., D. Garant, and A. J. Wilson. 2014. The effects of other’s genes: maternal and  
458 other indirect genetic effects. *in* A. Charmantier, D. Garant, and L. E. B. Kruuk, eds.  
459 *Quantitative genetics in the wild (First.)*. Oxford University Press, Oxford.
- 460 Messina, F. J., and J. D. Fry. 2003. Environment-dependent reversal of a life history trade-off in  
461 the seed beetle *Callosobruchus maculatus*. *Journal of Evolutionary Biology* 16:501–509.
- 462 Mousseau, T. A., and H. Dingle. 1991. Maternal Effects in Insect Life Histories. *Annual Review*  
463 *of Entomology* 36:511–534.
- 464 Mousseau, T. A., and C. W. Fox. 1998. The adaptive significance of maternal effects. *Trends in*  
465 *Ecology & Evolution* 13:403–406.
- 466 Nakagawa, S., and H. Schielzeth. 2010. Repeatability for Gaussian and non-Gaussian data: a  
467 practical guide for biologists. *Biological Reviews* 85:no-no.
- 468 Olofsson, H., J. Ripa, and N. Jonzén. 2009. Bet-hedging as an evolutionary game: the trade-off  
469 between egg size and number. *Proceedings of the Royal Society of London B: Biological*

- 470 Sciences 276.
- 471 Räsänen, K., and L. E. B. Kruuk. 2007. Maternal effects and evolution at ecological time-scales.  
472 Functional Ecology 21:408–421.
- 473 Rowiński, P. K., and B. Rogell. 2017. Environmental stress correlates with increases in both  
474 genetic and residual variances: A meta-analysis of animal studies. Evolution.
- 475 Rudin-Bitterli, T. S., N. J. Mitchell, and J. P. Evans. 2018. Environmental Stress Increases the  
476 Magnitude of Nonadditive Genetic Variation in Offspring Fitness in the Frog *Crinia georgiana* .  
477 The American Naturalist.
- 478 Saxton, A. M., and SAS Institute. 2004. Genetic analysis of complex traits using SAS. SAS  
479 Institute.
- 480 Sheriff, M. J., C. J. Krebs, and R. Boonstra. 2010. The ghosts of predators past: Population  
481 cycles and the role of maternal programming under fluctuating predation risk. Ecology 91:2983–  
482 2994.
- 483 Sheriff, M. J., and O. P. Love. 2013. Determining the adaptive potential of maternal stress.  
484 Ecology Letters.
- 485 Storm, J. J., and S. L. Lima. 2010. Mothers forewarn offspring about predators: a  
486 transgenerational maternal effect on behavior. The American naturalist 175:382–90.
- 487 Stroup, W., and R. Littell. 2002. Impact of variance component estimates on fixed effect  
488 inference in unbalanced linear mixed models. Conference on Applied Statistics in Agriculture.
- 489 Thaler, J. S., S. H. McArt, and I. Kaplan. 2012. Compensatory mechanisms for ameliorating the

490 fundamental trade-off between predator avoidance and foraging. *Proceedings of the National*  
491 *Academy of Sciences of the United States of America* 109:12075–80.

492 Tigreros, N., R. H. Norris, E. H. Wang, and J. S. Thaler. 2017. Maternally induced intraclutch  
493 cannibalism: an adaptive response to predation risk? *Ecology Letters* 20:487–494.

494 Tigreros, N., E. H. Wang, and J. S. Thaler. 2018. Prey nutritional state drives divergent  
495 behavioural and physiological responses to predation risk. *Functional Ecology* 32:982–989.

496 Wade, M. J. 1998. The evolutionary genetics of maternal effects. Pages 5–21 *in* *Maternal Effects*  
497 *as Adaptations*.

498 White, S. J., and A. J. Wilson. 2019. Evolutionary genetics of personality in the Trinidadian  
499 guppy I: maternal and additive genetic effects across ontogeny. *Heredity*.

500 Wilson, A. J., and D. Reale. 2006. Ontogeny of additive and maternal genetic effects: lessons  
501 from domestic mammals. *The American naturalist*.

502 Wolf, J. B., E. D. Brodie III, J. M. Cheverud, A. J. Moore, and M. J. Wade. 1998. Evolutionary  
503 consequences of indirect genetic effects. *Trends in Ecology & Evolution* 13:64–69.

504

505

506

507
